# Supplementary material
Source: ML conference proceedings conference paper supplement (https://openreview.net/forum?id=Cri3xz59ga)
Supplement: supplementary_material [file attachment]

# README file for the ‘RMT-MTLLSSVM’ Matlab and Julia Package

## Abstract

This document explains how to use the code implementing the Random Matrix Improved Multi-Task Learning Least Square Support Vector Machine (RMT-MTLLSSVM) proposed in the article ‘**Deciphering and Optimizing Multi-Task Learning: a Random Matrix Approach**’.

## 1 For Matlab users

### 1.1 Archive content

- The function implementing the multi class extension is called `RMTMTLLSSVM_train.m` which trains the MTL LS-SVM proposed algorithm.
- The function implementing the binary classification is called `MTLLSSVMTrain.binary.m` which trains the MTL LS-SVM proposed binary algorithm.
- The main script comparing all algorithms for synthetic data/real data is `CompareMTL.m` for the multi class classification for SURF-BOW features.
- The main script comparing all algorithms for synthetic data/real data is `CompareMTL2.m` for the multi class classification for VGG features.
- The main script illustrating the binary classification with fixed probability of false alarm is `PFA.m`.
- Folder `utils`: containing alternative MTL algorithms among which MMDT algorithm, CDLS algorithm, ILS algorithm and LS-SVM on source or target<sup>1</sup> and other functions used for the proposed method.
- Folder `datasets`: containing Office+Caltech dataset Mit-Bih dataset and Mnist dataset.

---

<sup>1</sup>To use these codes, one needs to have a Matlab compiler for Mex files

## 1.2 Code binary\_experiments

The different options proposed to execute the script `binary_experiments` are as follows:

- The training size  $n_s$
- The test size  $n_{st}$
- The hyperparameters  $\lambda$  and  $\gamma$  and the value of  $\beta$  relating the tasks.

## 1.3 Code CompareMTL.m and CompareMTL2.m

The different options proposed to execute the script `CompareMTL.m` and `CompareMTL2.m` comparing the different Multi Task algorithms are as follows:

- “**dataset**” to be chosen as ‘a-d’ such that a (for the source) and d (for target) are chosen between *A for Amazon*, *Ca for Caltech*, *D for DSLR*, *W for Webcam*. For illustration, for a MTL with source task Amazon and target task Caltech, the setting is “dataset=’A-Ca’”
- “**number\_trials**” which represents the number of trials to be tested for each dataset in order to average performances.

## 1.4 Code PFA.m

The different options proposed to execute the script `PFA.m` are as follows:

- “**data**” to be chosen between ‘*synthetic*’ and ‘*real*’ to test the binary classification with fixed probability of false alarm either on synthetic data or real data.
- “**n\_training\_sample**” is the number of training examples to be sampled from the overall training set.
- Parameters for synthetic data (the dimension of the sample  $\mathbf{p}$ , the number of samples of each class of the 2 tasks  $[n_{11}, n_{12}, n_{21}, n_{22}]$  as well as the mean of each class of each task  $[\mu_{11}, \mu_{12}, \mu_{21}, \mu_{22}]$ ).

# 2 For Julia users

## 2.1 Archive content

- The main script for experiments on binary classification is `binary_classification.jl`.
- The main script comparing the classical/improved MTL-LSSVM algorithm and the for synthetic data/real data is `CompareMTL.jl` for the multi class classification for SURF-BOW and VGG features.

- The main script illustrating the binary classification with fixed probability of false alarm is `PFA.jl`.
- The file `utils`: containing the function implementing the proposed MTL LS-SVM algorithm and some other function for generating the data, etc.

## 2.2 Code CompareMTL.jl

The various options proposed to execute the script are:

- The `data_type` among which we can choose "OFFICE", "OFFICE\_VGG" or "synthetic".
- “`dataset`” to be chosen as 'a-d' such that a (for the source) and d (for target) are chosen between *A for Amazon*, *Ca for Caltech*, *D for DSLR*, *W for Webcam*. For illustration, for a MTL with source task Amazon and target task Caltech, the setting is “`dataset='A-Ca'`”

Note that the script doesn't contain the implementation of alternative methods (MMDT, CDLS, ILS). Their implementation can be found in the matlab script.

## References
